# Supplementary material for: Immobilization of Moniliella spathulata R25L270 Lipase on Ionic, Hydrophobic and Covalent Supports: Functional Properties and Hydrolysis of Sardine Oil
Source: MDPI journal article supplement (doi:10.3390/molecules22101508), 2017-09-25
Supplement: s1 [file s1]

**Nonlinear Regression**

terça-feira, março 03, 2015, 15:29:05

**Data Source:** Cinética de Michaelis in Octil, PEI e Treolase Cinética**Equation:** Hyperbola; Single Rectangular, 2 Parameter in Tempo de meia vida

$$f = a \cdot x / (b + x)$$

| <b>R</b> | <b>Rsqr</b> | <b>Adj Rsqr</b> | <b>Standard Error of Estimate</b> |
|----------|-------------|-----------------|-----------------------------------|
| 0,9762   | 0,9530      | 0,9462          | 0,1031                            |

|   | <b>Coefficient</b> | <b>Std. Error</b> | <b>t</b> | <b>P</b> |
|---|--------------------|-------------------|----------|----------|
| a | 2,0097             | 0,3064            | 6,5592   | 0,0003   |
| b | 0,4028             | 0,1371            | 2,9369   | 0,0218   |

**Analysis of Variance:**

|            | <b>DF</b> | <b>SS</b> | <b>MS</b> |
|------------|-----------|-----------|-----------|
| Regression | 2         | 8,4426    | 4,2213    |
| Residual   | 7         | 0,0744    | 0,0106    |
| Total      | 9         | 8,5171    | 0,9463    |

Corrected for the mean of the observations:

|            | <b>DF</b> | <b>SS</b> | <b>MS</b> | <b>F</b> | <b>P</b> |
|------------|-----------|-----------|-----------|----------|----------|
| Regression | 1         | 1,5078    | 1,5078    | 141,8238 | <0,0001  |
| Residual   | 7         | 0,0744    | 0,0106    |          |          |
| Total      | 8         | 1,5823    | 0,1978    |          |          |

**Statistical Tests:****Normality Test (Shapiro-Wilk)** Passed (P = 0,5464)

W Statistic= 0,9366 Significance Level = &lt;0,0001

**Constant Variance Test** Passed (P = 0,6758)**Fit Equation Description:**

[Variables]

x = col(1)

y = col(2)

reciprocal\_y = 1/abs(y)

reciprocal\_ysquare = 1/y^2

reciprocal\_pred = 1/abs(f)

reciprocal\_predsqr = 1/f^2

[Parameters]

a = max(y) "Auto {{previous: 2,0097}} {{MinRange: -114,522}} {{MaxRange: 343,566}}

b = if(x50(x;y;0,1)&lt;&gt;0; x50(x;y;0,1); 1) "Auto {{previous: 0,402753}} {{MinRange: -0,209038}}

{{MaxRange: 0,627114}}

[Equation]

f = a\*x/(b+x)

fit f to y

"fit f to y with weight reciprocal\_pred

"fit f to y with weight reciprocal\_predsqr

"fit f to y with weight reciprocal\_y

```
"fit f to y with weight reciprocal_ysquare  
[Constraints]  
[Options]  
tolerance=0,0000000001  
stepsize=1  
iterations=200
```

Number of Iterations Performed = 11
