# Supplementary material for: Immobilization of Moniliella spathulata R25L270 Lipase on Ionic, Hydrophobic and Covalent Supports: Functional Properties and Hydrolysis of Sardine Oil
Source: MDPI journal article supplement (doi:10.3390/molecules22101508), 2017-09-25
Supplement: s1 [file s1]

**Nonlinear Regression**

segunda-feira, março 02, 2015, 20:24:25

**Data Source:** Data 2 in Octil, PEI e Treolase Cinética**Equation:** Single Substrate; Michaelis-Menten in enzyme kinetics

$$v = V_{\max} * S / (K_m + S)$$

| <b>R</b> | <b>Rsqr</b> | <b>Adj Rsqr</b> | <b>Standard Error of Estimate</b> |
|----------|-------------|-----------------|-----------------------------------|
| 0,9709   | 0,9427      | 0,9345          | 0,0823                            |

|      | <b>Coefficient</b> | <b>Std. Error</b> | <b>t</b> | <b>P</b> |
|------|--------------------|-------------------|----------|----------|
| Vmax | 2,3849             | 0,8893            | 2,6817   | 0,0315   |
| Km   | 1,3820             | 0,7529            | 1,8356   | 0,1090   |

**Analysis of Variance:**

|            | <b>DF</b> | <b>SS</b> | <b>MS</b> |
|------------|-----------|-----------|-----------|
| Regression | 2         | 3,1525    | 1,5763    |
| Residual   | 7         | 0,0474    | 0,0068    |
| Total      | 9         | 3,1999    | 0,3555    |

Corrected for the mean of the observations:

|            | <b>DF</b> | <b>SS</b> | <b>MS</b> | <b>F</b> | <b>P</b> |
|------------|-----------|-----------|-----------|----------|----------|
| Regression | 1         | 0,7790    | 0,7790    | 115,1320 | <0,0001  |
| Residual   | 7         | 0,0474    | 0,0068    |          |          |
| Total      | 8         | 0,8264    | 0,1033    |          |          |

**Statistical Tests:**
**Normality Test (Shapiro-Wilk)** Passed (P = 0,0002)

W Statistic= 0,6260 Significance Level = &lt;0,0001

**Constant Variance Test** Passed (P = 0,0428)
**Fit Equation Description:**

[Variables]

S = col(6)

V = col(7)

' Weighting Functions

reciprocal\_V = if(V &lt;= 0; 0/0; 1/V)

reciprocal\_Vsquare = if(V &lt;= 0; 0/0; 1/V^2)

[Parameters]

Vmax = max(V)\*2 "Auto {{previous: 2,38492}}

Km = x50(S;V;0,1) "Auto {{previous: 1,38197}}

[Equation]

v = Vmax\*S/(Km+S)

fit v to V

"fit v to V with weight reciprocal\_V

"fit v to V with weight reciprocal\_Vsquare

[Constraints]

Vmax &gt; 0

Km &gt; 0

[Options]  
tolerance=0,00001  
stepsize=1  
iterations=200

Number of Iterations Performed = 10
