# Supplementary material for: Immobilization of Moniliella spathulata R25L270 Lipase on Ionic, Hydrophobic and Covalent Supports: Functional Properties and Hydrolysis of Sardine Oil
Source: MDPI journal article supplement (doi:10.3390/molecules22101508), 2017-09-25
Supplement: s1 [file s1]

**Nonlinear Regression**

segunda-feira, março 02, 2015, 19:59:56

**Data Source:** Cinética de Michaelis in Octil, PEI e Treolase Cinética**Equation:** Single Substrate; Michaelis-Menten in enzyme kinetics

$$v = V_{\max} * S / (K_m + S)$$

| R      | Rsqr   | Adj Rsqr | Standard Error of Estimate |
|--------|--------|----------|----------------------------|
| 0,9900 | 0,9801 | 0,9772   | 0,0449                     |

|      | Coefficient | Std. Error | t       | P       |
|------|-------------|------------|---------|---------|
| Vmax | 1,0369      | 0,0457     | 22,6873 | <0,0001 |
| Km   | 0,1002      | 0,0204     | 4,9163  | 0,0017  |

**Analysis of Variance:**

|            | DF | SS     | MS     |
|------------|----|--------|--------|
| Regression | 2  | 5,2437 | 2,6219 |
| Residual   | 7  | 0,0141 | 0,0020 |
| Total      | 9  | 5,2578 | 0,5842 |

Corrected for the mean of the observations:

|            | DF | SS     | MS     | F        | P       |
|------------|----|--------|--------|----------|---------|
| Regression | 1  | 0,6943 | 0,6943 | 344,1766 | <0,0001 |
| Residual   | 7  | 0,0141 | 0,0020 |          |         |
| Total      | 8  | 0,7084 | 0,0886 |          |         |

**Statistical Tests:**
**Normality Test (Shapiro-Wilk)** Passed (P = 0,1017)

W Statistic= 0,8624 Significance Level = &lt;0,0001

**Constant Variance Test** Passed (P = <0,0001)
**Fit Equation Description:**

[Variables]

S = col(35)

V = col(36)

' Weighting Functions

reciprocal\_V=if(V&lt;=0; 0/0; 1/V)

reciprocal\_Vsquare=if(V&lt;=0; 0/0; 1/V^2)

[Parameters]

Vmax = max(V)\*2 "Auto {{previous: 1,03685}}

Km = x50(S;V;0,1) "Auto {{previous: 0,100224}}

[Equation]

v=Vmax\*S/(Km+S)

fit v to V

"fit v to V with weight reciprocal\_V

"fit v to V with weight reciprocal\_Vsquare

[Constraints]

Vmax&gt;0

Km&gt;0

[Options]  
tolerance=0,00001  
stepsize=1  
iterations=200

Number of Iterations Performed = 7
