# Supplementary material for: Immobilization of Moniliella spathulata R25L270 Lipase on Ionic, Hydrophobic and Covalent Supports: Functional Properties and Hydrolysis of Sardine Oil
Source: MDPI journal article supplement (doi:10.3390/molecules22101508), 2017-09-25
Supplement: s1 [file s1]

**Nonlinear Regression**

segunda-feira, março 02, 2015, 20:22:23

**Data Source:** Data 2 in Octil, PEI e Treolase Cinética**Equation:** Single Substrate; Michaelis-Menten in enzyme kinetics

$$v = V_{\max} * S / (K_m + S)$$

| R      | Rsqr   | Adj Rsqr | Standard Error of Estimate |
|--------|--------|----------|----------------------------|
| 0,9913 | 0,9827 | 0,9802   | 0,0474                     |

|      | Coefficient | Std. Error | t      | P      |
|------|-------------|------------|--------|--------|
| Vmax | 2,4794      | 0,4997     | 4,9621 | 0,0016 |
| Km   | 1,3578      | 0,4017     | 3,3798 | 0,0118 |

**Analysis of Variance:**

|            | DF | SS     | MS     |
|------------|----|--------|--------|
| Regression | 2  | 3,4896 | 1,7448 |
| Residual   | 7  | 0,0157 | 0,0022 |
| Total      | 9  | 3,5053 | 0,3895 |

Corrected for the mean of the observations:

|            | DF | SS     | MS     | F        | P       |
|------------|----|--------|--------|----------|---------|
| Regression | 1  | 0,8920 | 0,8920 | 397,5430 | <0,0001 |
| Residual   | 7  | 0,0157 | 0,0022 |          |         |
| Total      | 8  | 0,9077 | 0,1135 |          |         |

**Statistical Tests:**
**Normality Test (Shapiro-Wilk)** Passed (P = 0,0021)

W Statistic= 0,7140 Significance Level = &lt;0,0001

**Constant Variance Test** Passed (P = 0,0583)
**Fit Equation Description:**

[Variables]

S = col(1)

V = col(2)

' Weighting Functions

reciprocal\_V = if(V &lt;= 0; 0/0; 1/V)

reciprocal\_Vsquare = if(V &lt;= 0; 0/0; 1/V^2)

[Parameters]

Vmax = max(V)\*2 "Auto {{previous: 2,47936}}

Km = x50(S;V;0,1) "Auto {{previous: 1,35781}}

[Equation]

v = Vmax\*S/(Km+S)

fit v to V

"fit v to V with weight reciprocal\_V

"fit v to V with weight reciprocal\_Vsquare

[Constraints]

Vmax &gt; 0

Km &gt; 0

[Options]  
tolerance=0,00001  
stepsize=1  
iterations=200

Number of Iterations Performed = 9
