# Supplementary material for: Immobilization of Moniliella spathulata R25L270 Lipase on Ionic, Hydrophobic and Covalent Supports: Functional Properties and Hydrolysis of Sardine Oil
Source: MDPI journal article supplement (doi:10.3390/molecules22101508), 2017-09-25
Supplement: s1 [file s1]

## Supplementary file for calculating the kinetic parameters

### Catalytic Properties

Values for apparent  $K_M$  and  $V_{max}$  were calculated based on Michaelis–Menten equation using the computational program Sigma Plot software. 10.0.

Table Suplemmentary 1: Kinetic constants of *M. spathulata* R25L270 lipase immobilized on different supports determined by hydrolysis of *p*-NPP. Values are the average of three independent replicates with coefficient of variation less than 10%

| Substrate |              | V ( $\mu\text{moles.min}^{-1}$ ) |             |                 |            |                   |
|-----------|--------------|----------------------------------|-------------|-----------------|------------|-------------------|
| pNPP (mM) | DEAE-Agarose | CNBr activated                   | Free lipase | Octyl-Sepharose | Octyl+ PEI | Octyl + Trehalose |
| 0.0       | 0.00         | 0.00                             | 0.00        | 0.00            | 0.00       | 0.00              |
| 0.1       | 0.52         | 0.54                             | 0.15        | 0.17            | 0.18       | 0.16              |
| 0.2       | 0.61         | 0.68                             | 0.25        | 0.32            | 0.33       | 0.29              |
| 0.3       | 0.91         | 0.79                             | 0.40        | 0.49            | 0.46       | 0.45              |
| 0.4       | 0.89         | 0.81                             | 0.51        | 0.59            | 0.59       | 0.55              |
| 0.5       | 1.15         | 0.84                             | 0.72        | 0.67            | 0.64       | 0.625             |
| 0.6       | 1.04         | 0.84                             | 0.71        | 0.65            | 0.53       | 0.66              |
| 0.7       | 1.38         | 0.88                             | 0.91        | 0.87            | 0.84       | 0.92              |
| 0.8       | 1.38         | 1.02                             | 1.02        | 1.05            | 1.05       | 1.04              |
| 0.9       |              |                                  | 0.89        | 1.02            | 1.04       | 1.04              |
| 1.0       |              |                                  |             | 1.07            | 1.05       | 1.04              |
