# Supplementary material for: Immobilization of Moniliella spathulata R25L270 Lipase on Ionic, Hydrophobic and Covalent Supports: Functional Properties and Hydrolysis of Sardine Oil
Source: MDPI journal article supplement (doi:10.3390/molecules22101508), 2017-09-25
Supplement: s1 [file s1]

**Nonlinear Regression**

segunda-feira, março 02, 2015, 20:32:15

**Data Source:** Octil e Derivados CERTO in Octil, PEI e Treolase Cinética**Equation:** Single Substrate; Michaelis-Menten in enzyme kinetics

$$v = V_{\max} * S / (K_m + S)$$

| R      | Rsqr   | Adj Rsqr | Standard Error of Estimate |
|--------|--------|----------|----------------------------|
| 0,9911 | 0,9822 | 0,9797   | 0,0481                     |

|      | Coefficient | Std. Error | t      | P      |
|------|-------------|------------|--------|--------|
| Vmax | 2,7911      | 0,6766     | 4,1250 | 0,0044 |
| Km   | 1,6618      | 0,5606     | 2,9645 | 0,0210 |

**Analysis of Variance:**

|            | DF | SS     | MS     |
|------------|----|--------|--------|
| Regression | 2  | 3,3391 | 1,6696 |
| Residual   | 7  | 0,0162 | 0,0023 |
| Total      | 9  | 3,3553 | 0,3728 |

Corrected for the mean of the observations:

|            | DF | SS     | MS     | F        | P       |
|------------|----|--------|--------|----------|---------|
| Regression | 1  | 0,8926 | 0,8926 | 386,5755 | <0,0001 |
| Residual   | 7  | 0,0162 | 0,0023 |          |         |
| Total      | 8  | 0,9088 | 0,1136 |          |         |

**Statistical Tests:**
**Normality Test (Shapiro-Wilk)** Passed (P = 0,3529)

W Statistic= 0,9151 Significance Level = &lt;0,0001

**Constant Variance Test** Passed (P = 0,0200)
**Fit Equation Description:**

[Variables]

S = col(10)

V = col(11)

' Weighting Functions

reciprocal\_V = if(V &lt;= 0; 0/0; 1/V)

reciprocal\_Vsquare = if(V &lt;= 0; 0/0; 1/V^2)

[Parameters]

Vmax = max(V)\*2 "Auto {{previous: 2,79107}}

Km = x50(S;V;0,1) "Auto {{previous: 1,66179}}

[Equation]

v = Vmax\*S/(Km+S)

fit v to V

"fit v to V with weight reciprocal\_V

"fit v to V with weight reciprocal\_Vsquare

[Constraints]

Vmax &gt; 0

Km &gt; 0

[Options]  
tolerance=0,00001  
stepsize=1  
iterations=200

Number of Iterations Performed = 9
